# Supplementary material for: Characterization of the Role of the Neoxanthin Synthase Gene BoaNXS in Carotenoid Biosynthesis in Chinese Kale
Source: MDPI journal article supplement (doi:10.3390/genes12081122), 2021-07-24
Supplement: s1 [file s1]

**Table S1 Primers used in this study**

| Primer name              | Primer sequence (5'-3')           | Aims                                |
|--------------------------|-----------------------------------|-------------------------------------|
| <i>NXS</i> -F            | ATGGCTTTTCTCAGCCTTTGTCTTC         | Molecular cloning of <i>NXS</i> CDS |
| <i>NXS</i> -R            | TTACTTGCACTGGTTGTTGGTGTTG         |                                     |
| <i>NXS</i> -GFP-F        | CGGGATCCATGGCTTTTCTCAGCCTTTGTCTTC |                                     |
| <i>NXS</i> -GFP-R        | GCGTCGACCTTGCACTGGTTGTTGGTGTTG    |                                     |
| <i>NXS</i> -pCAM-F       | CGGGATCCATGGCTTTTCTCAGCCTTTGTCTTC | Subcellular localization            |
| <i>NXS</i> -pCAM-R       | GCGTCGACCTTGCACTGGTTGTTGGTGTTG    |                                     |
| <i>NXS</i> -qPCR-F       | CAGTTGACATGCCAGCAAGTCC            |                                     |
| <i>NXS</i> -qPCR-R       | CGAATCGGATGATACTGGGGA             |                                     |
| $\beta$ -actin-qPCR-F    | CCAGAGGTCTTGTTCCAGCCATC           | Primers for overexpression sites    |
| $\beta$ -actin-qPCR-R    | GTTCCACCACTGAGCACAATGTTAC         |                                     |
| <i>PSY1</i> -qPCR-F      | AAGGGCTGTAGAGTCTTCTAGA            |                                     |
| <i>PSY1</i> -qPCR-R      | CGTTTTTGTTGTTTGCTTCCTC            |                                     |
| <i>PSY2</i> -qPCR-F      | GGGACCTTGATGATCTGAAGAA            |                                     |
| <i>PSY2</i> -qPCR-R      | TTCACCCAACAAACTCAAATC             |                                     |
| <i>PSY3</i> -qPCR-F      | TTCATGAGACTGCAGCTTAAGA            |                                     |
| <i>PSY3</i> -qPCR-R      | CCCAACATAAGCTCTCTTGGA             |                                     |
| <i>PDS1</i> -qPCR-F      | GATCTCTTCACAAGCGCTTAAG            |                                     |
| <i>PDS1</i> -qPCR-R      | GCTTCCAAGAAATTGACAGTGT            |                                     |
| <i>PDS2</i> -qPCR-F      | TCATCTGGAGGTTGTGATTTGA            |                                     |
| <i>PDS2</i> -qPCR-R      | ATATCCACACAAACTACCTGCA            |                                     |
| <i>ZISO</i> -qPCR-F      | CGTTGTTTGATCGATAACTCC             |                                     |
| <i>ZISO</i> -qPCR-R      | GCTAATCCACTATGCACAGTTG            |                                     |
| <i>ZDS</i> -qPCR-F       | CGTTCCTTGTCCTCGAGCAA              |                                     |
| <i>ZDS</i> -qPCR-R       | CCTCGGAGGTTTCATGTTAGGTCTTC        |                                     |
| <i>CRTISO</i> -qPCR-F    | AGATTGGGAGGGACTCACTCCA            | Detection of gene expression        |
| <i>CRTISO</i> -qPCR-R    | CGTTCCTTGTCCTCGAGCAA              |                                     |
| <i>LCYb</i> -qPCR-F      | GTTGTTGATCTAGCTATCGTTGGC          |                                     |
| <i>LCYb</i> -qPCR-R      | GAGTTTGGGGGAAGGATCGAT             |                                     |
| <i>LCYe1</i> -qPCR-F     | GGTTTGTGTAGTAGAGTCGTCA            |                                     |
| <i>LCYe1</i> -qPCR-R     | TCAACGAGCTTAGACTGTTCAT            |                                     |
| <i>LCYe2</i> -qPCR-F     | CAGGTTCCGGTATAGAGAGTTG            |                                     |
| <i>LCYe2</i> -qPCR-R     | ACGTATAGAATCTCCGAACCAC            |                                     |
| $\beta$ -OHase-qPCR-F    | CCTAATGGAGTGAAAAGCATCG            |                                     |
| $\beta$ -OHase-qPCR-R    | TCTTTACTGTTGATGGGAAGCT            |                                     |
| $\epsilon$ -OHase-qPCR-F | TCTCCTAAACCCAGATTCTGTCTCC         |                                     |
| $\epsilon$ -OHase-qPCR-R | GCGAGTGAGTGATGTGAGCCA             |                                     |
| <i>VDE</i> -qPCR-F       | AAGGCATTTCCTCACATCCTTA            |                                     |

---

|                     |                        |
|---------------------|------------------------|
| <i>VDE</i> -qPCR-R  | ACCAAGAAAGTGCCTTTGATTC |
| <i>ZEP1</i> -qPCR-F | AGAAGTCCTAGTTTCACTTGGG |
| <i>ZEP1</i> -qPCR-R | TCTGTTTCCATGCTTGTTCAAG |
| <i>ZEP2</i> -qPCR-F | AGAACTCCTAGTTTCACTTGGG |
| <i>ZEP2</i> -qPCR-R | TATCCTCAATGGCCATACATCC |

---

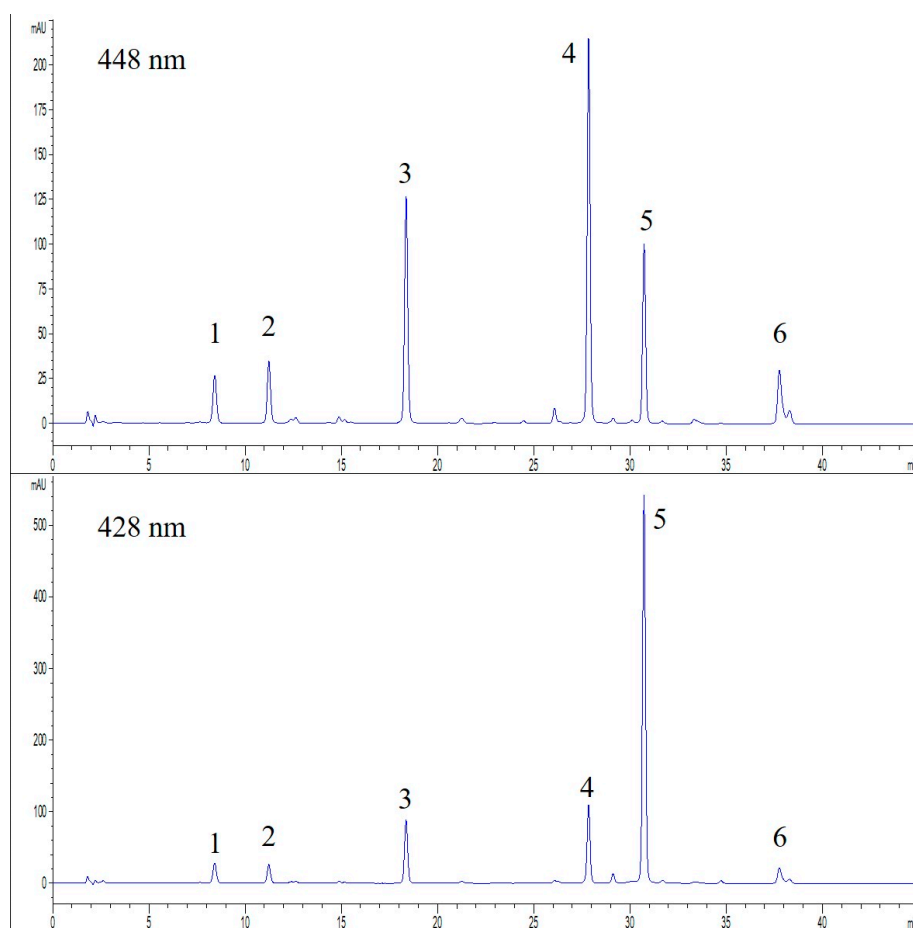

**Figure S1. High-performance liquid chromatography profile of carotenoids and chlorophyll in Chinese kale leaves. 1, neoxanthin, 2, violaxanthin, 3, lutein, 4, Chlorophyll b, 5, chlorophyll a, and 6,  $\beta$ -carotene. Chlorophyll a is detected at 428 nm, and other pigments are detected at 448 nm.**
